# Supplementary material for: Antibacterial Activity and Mechanism of Canagliflozin against Methicillin-Resistant Staphylococcus aureus
Source: MDPI journal article supplement (doi:10.3390/molecules28155668), 2023-07-26
Supplement: s1 [file s1]

**Table S1.** List of primers used for qPCR analysis.

| Primer     | (5'to3')                   | Base number |
|------------|----------------------------|-------------|
| 16S rRNA-F | CATGCTGATCTACGATTACT       | 20          |
| 16S rRNA-R | CCATAAAGTTGTTCTCAGTT       | 20          |
| mecA-F     | GTTAGATTGGGATCATAGCGTCATT  | 25          |
| mecA-R     | TGCCTAATCTCATATGTGTTCTGTAT | 27          |
| mgrA-F     | GGGATGAATCTCCTGTAAACG      | 21          |
| mgrA-R     | TTGATCGACTTCGGAACG         | 18          |
| fnbA-F     | ATCAGCAGATGTAGCGGAAG       | 20          |
| fnbA-R     | TTAGTACCGCTCGTTGTCC        | 20          |
| cna-F      | AAAGCGTTGCCTAGTGGAGA       | 20          |
| cna-R      | AGTGCCTTCCCAAACCTTT        | 19          |
| crtM-F     | ATCCAGAACCACCCGTTTTT       | 20          |
| crtM-R     | GCGATGAAGGTATTGGCATT       | 20          |
| clfA-F     | ATTGGCGTGGCTTCAGTGCT       | 20          |
| clfA-R     | CGTTTCTCCGTAGTTGCATTG      | 23          |
| hld-F      | TAATTAAGGAAGGAGTGATTCAATG  | 26          |
| hld-R      | TTTTTAGTGAATTTGTTCACTGTGTC | 26          |
| agrC-F     | CATTCGCGTTGCATTTATTG       | 20          |
| agrC-R     | CCTAAACCACGACCTTCACC       | 20          |
| sarA-F     | CAAACAACCACAAGTTGTAAAGC    | 24          |
| sarA-R     | TGTTTGCTTCAGTGATTCGTTT     | 22          |

**Table S2.** Thermal cyclic conditions used for qPCR analysis

|                             |                        |                  |
|-----------------------------|------------------------|------------------|
| <b>Initial denaturation</b> | <b>95°C for 1 min</b>  | <b>40 cycles</b> |
| <b>Denaturation</b>         | <b>95°C for 15 sec</b> |                  |
| <b>Annealing</b>            | <b>60°C for 45 sec</b> |                  |
| <b>Extension</b>            | <b>72°C for 6 sec</b>  |                  |

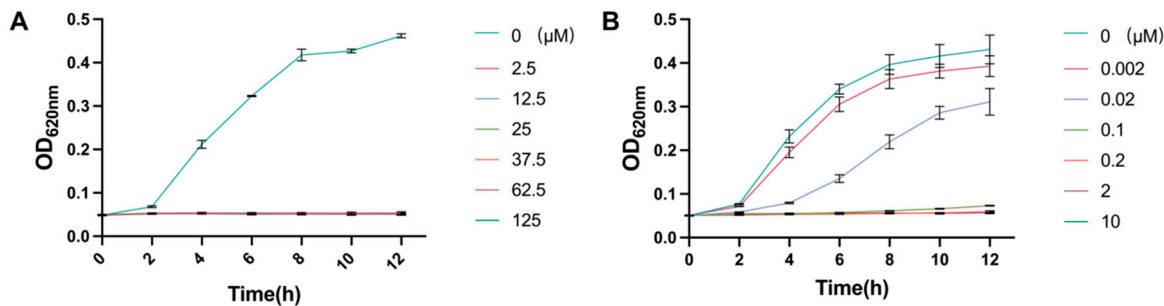

**Figure S1.** (A)MSSA growth curves at different concentrations of PNC. (B)MSSA growth curves at different concentrations of DOX.

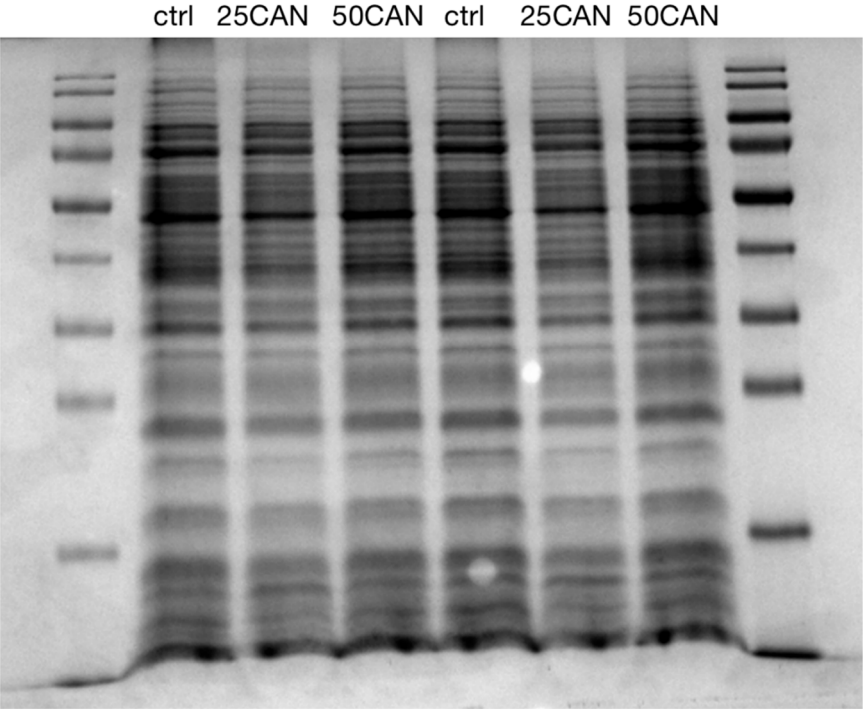

**Figure S2.** SDS-PAGE analysis of intracellular soluble proteins of MRSA treated with CAN of 25 $\mu$ M and 50 $\mu$ M for 12 hours.

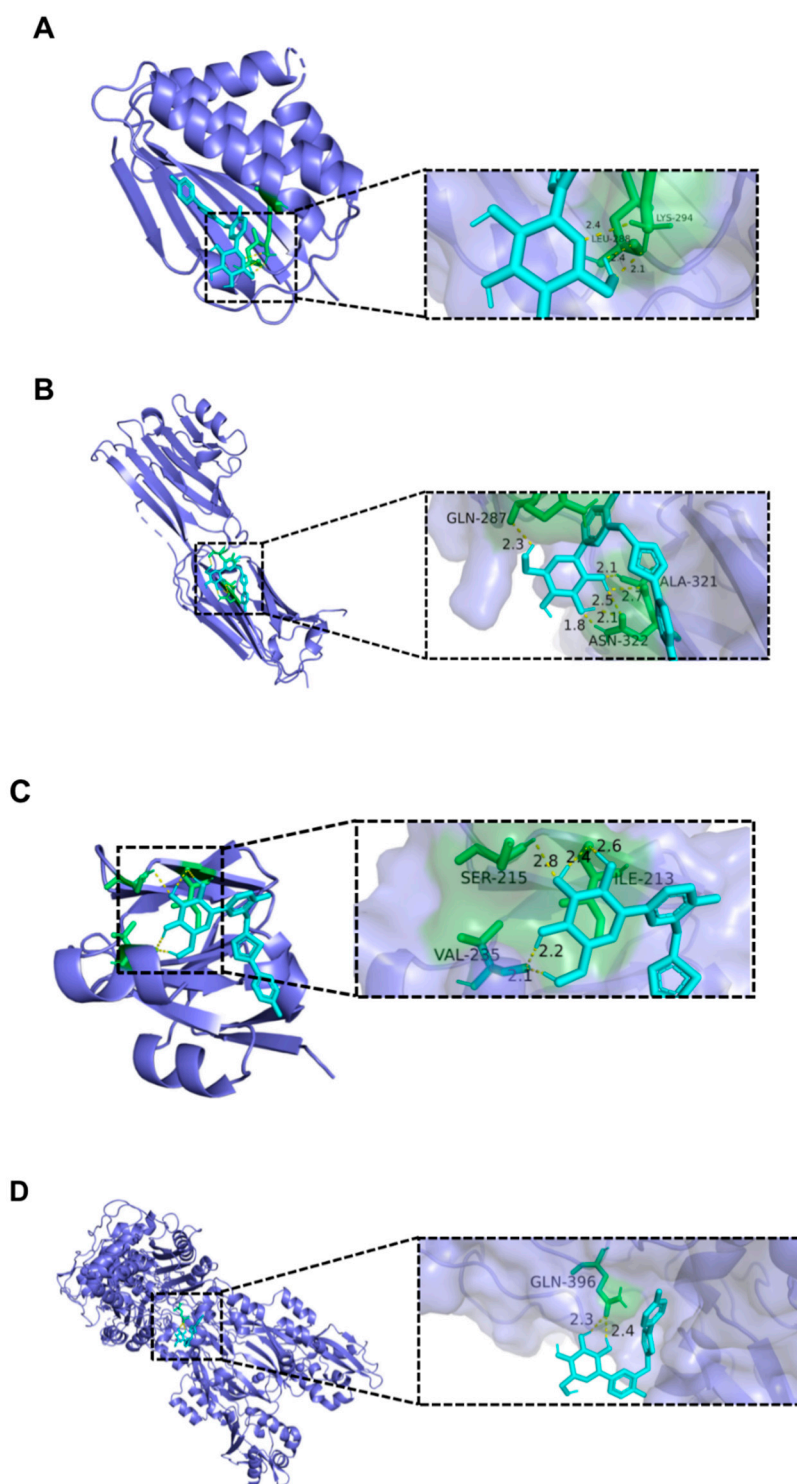

**Figure S3.** Molecular docking between CAN and bacterial protein active sites. (A) The binding poses and interactions of CAN with agrC, binding energy: -5.55 kcal/mol. (B) The binding poses and interactions of CAN with cna, binding energy: -5.04 kcal/mol. (C) The binding poses and interactions of CAN with agrA, binding energy: -4.85 kcal/mol. (C) The binding poses and interactions of CAN with PBP2a, binding energy: -3.8 kcal/mol.
